# Supplementary material for: Simulation of the chemical evolution of biomass burning organic aerosol
Source: Copernicus journal article supplement (doi:10.5194/acp-19-5403-2019), 2019-04-24
Supplement: Supplementary file 1 [file acp-19-5403-2019-supplement.pdf]

Supplement of Atmos. Chem. Phys., 19, 5403–5415, 2019  
<https://doi.org/10.5194/acp-19-5403-2019-supplement>  
© Author(s) 2019. This work is distributed under  
the Creative Commons Attribution 4.0 License.

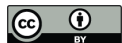

*Supplement of*

## **Simulation of the chemical evolution of biomass burning organic aerosol**

**Georgia N. Theodoritsi and Spyros N. Pandis**

*Correspondence to:* Spyros Pandis ([spyros@chemeng.upatras.gr](mailto:spyros@chemeng.upatras.gr))

The copyright of individual parts of the supplement might differ from the CC BY 4.0 License.

1 **Table S1.** POA and bbPOA emission rates (in tn d<sup>-1</sup>) for each volatility bin during the  
 2 simulated periods.

| C* at 298 K<br>(µg m <sup>-3</sup> )                            | 10 <sup>-2</sup> | 10 <sup>-1</sup> | 10 <sup>0</sup> | 10 <sup>1</sup> | 10 <sup>2</sup> | 10 <sup>3</sup> | 10 <sup>4</sup> | 10 <sup>5</sup> | 10 <sup>6</sup> |
|-----------------------------------------------------------------|------------------|------------------|-----------------|-----------------|-----------------|-----------------|-----------------|-----------------|-----------------|
| 1-29 May 2008 emission rate (tn d <sup>-1</sup> )               |                  |                  |                 |                 |                 |                 |                 |                 |                 |
| fPOA                                                            | 100              | 200              | 310             | 480             | 620             | 1000            | 1400            | 1700            | 2700            |
| bbPOA (Base case)                                               | 530              | 0                | 260             | 260             | 530             | 260             | 800             | 1300            | 2100            |
| bbPOA (Sensitivity test)                                        | 580              | 0                | 290             | 290             | 580             | 290             | 870             | -               | -               |
| 25 February – 22 March 2009 emission rate (tn d <sup>-1</sup> ) |                  |                  |                 |                 |                 |                 |                 |                 |                 |
| fPOA                                                            | 70               | 140              | 210             | 330             | 420             | 700             | 930             | 1200            | 1900            |
| bbPOA (Base case)                                               | 2100             | 0                | 1000            | 1000            | 2100            | 1000            | 3100            | 5100            | 8200            |
| bbPOA (Sensitivity test)                                        | 2300             | 0                | 1100            | 1100            | 2300            | 1100            | 3400            | -               | -               |

- 1 **Table S2.** Prediction skill metrics of PMCAMx-SR (base case) against AMS factor  
 2 analysis in May 2008<sup>a</sup>.

|           | Mean<br>Observed<br>( $\mu\text{g m}^{-3}$ ) | Mean<br>Predicted<br>( $\mu\text{g m}^{-3}$ ) | MB<br>( $\mu\text{g m}^{-3}$ ) | MAGE<br>( $\mu\text{g m}^{-3}$ ) | FBIAS | FERROR |
|-----------|----------------------------------------------|-----------------------------------------------|--------------------------------|----------------------------------|-------|--------|
| Cabauw    |                                              |                                               |                                |                                  |       |        |
| OA        | 4.37                                         | 5.55                                          | 1.18                           | 1.68                             | 0.30  | 0.39   |
| HOA       | 0.59                                         | 0.33                                          | -0.27                          | 0.31                             | -0.56 | 0.69   |
| BBOA      | 0.43                                         | 0.42                                          | -0.01                          | 0.36                             | -0.18 | 0.53   |
| OOA       | 3.34                                         | 4.80                                          | 1.46                           | 1.64                             | 0.42  | 0.46   |
| Finokalia |                                              |                                               |                                |                                  |       |        |
| OA        | 2.49                                         | 3.00                                          | 0.50                           | 0.92                             | 0.21  | 0.36   |
| HOA       | 0.09                                         | 0.03                                          | -0.06                          | 0.07                             | -0.81 | 0.97   |
| BBOA      | -                                            | 0.03                                          | -                              | -                                | -     | -      |
| OOA       | 2.41                                         | 2.94                                          | 0.54                           | 0.92                             | 0.23  | 0.37   |
| Melpitz   |                                              |                                               |                                |                                  |       |        |
| OA        | 5.12                                         | 4.45                                          | -0.68                          | 1.32                             | -0.13 | 0.28   |
| HOA       | 0.27                                         | 0.14                                          | -0.13                          | 0.17                             | -0.62 | 0.83   |
| BBOA      | -                                            | 0.12                                          | -                              | -                                | -     | -      |
| OOA       | 4.86                                         | 4.19                                          | -0.66                          | 1.29                             | -0.14 | 0.29   |
| Mace Head |                                              |                                               |                                |                                  |       |        |
| OA        | 2.29                                         | 2.62                                          | 0.34                           | 1.08                             | 0.05  | 0.43   |
| HOA       | 0.28                                         | 0.07                                          | -0.21                          | 0.21                             | -1.09 | 1.12   |
| BBOA      | 0.39                                         | 0.04                                          | -0.35                          | 0.35                             | -1.66 | 1.66   |
| OOA       | 1.61                                         | 2.51                                          | 0.89                           | 1.12                             | 0.34  | 0.50   |

- 3 <sup>a</sup>Number of data points; Cabauw: 623; Finokalia: 494; Melpitz: 155; Mace Head: 329.

- 1 **Table S3.** Prediction skill metrics of PMCAMx-SR (sensitivity test) against AMS  
 2 factor analysis in May 2008<sup>a</sup>.

|           | Mean<br>Observed<br>( $\mu\text{g m}^{-3}$ ) | Mean<br>Predicted<br>( $\mu\text{g m}^{-3}$ ) | MB<br>( $\mu\text{g m}^{-3}$ ) | MAGE<br>( $\mu\text{g m}^{-3}$ ) | FBIAS | FERROR |
|-----------|----------------------------------------------|-----------------------------------------------|--------------------------------|----------------------------------|-------|--------|
| Cabauw    |                                              |                                               |                                |                                  |       |        |
| OA        | 4.37                                         | 5.23                                          | 0.86                           | 1.49                             | 0.25  | 0.36   |
| HOA       | 0.59                                         | 0.33                                          | -0.27                          | 0.32                             | -0.57 | 0.71   |
| BBOA      | 0.43                                         | 0.46                                          | 0.03                           | 0.38                             | -0.14 | 0.54   |
| OOA       | 3.34                                         | 4.44                                          | 1.10                           | 1.35                             | 0.35  | 0.41   |
| Finokalia |                                              |                                               |                                |                                  |       |        |
| OA        | 2.45                                         | 2.72                                          | 0.22                           | 0.79                             | 0.12  | 0.33   |
| HOA       | 0.09                                         | 0.03                                          | -0.07                          | 0.07                             | -0.83 | 0.99   |
| BBOA      | -                                            | 0.03                                          | -                              | -                                | -     | -      |
| OOA       | 2.41                                         | 2.65                                          | 0.25                           | 0.77                             | 0.14  | 0.33   |
| Melpitz   |                                              |                                               |                                |                                  |       |        |
| OA        | 5.12                                         | 4.16                                          | -0.96                          | 1.38                             | -0.19 | 0.29   |
| HOA       | 0.27                                         | 0.13                                          | -0.13                          | 0.17                             | -0.63 | 0.84   |
| BBOA      | -                                            | 0.13                                          | -                              | -                                | -     | -      |
| OOA       | 4.86                                         | 3.89                                          | -0.96                          | 1.34                             | -0.21 | 0.31   |
| Mace Head |                                              |                                               |                                |                                  |       |        |
| OA        | 2.29                                         | 2.49                                          | 0.20                           | 0.99                             | 0.01  | 0.42   |
| HOA       | 0.28                                         | 0.07                                          | -0.21                          | 0.21                             | -1.11 | 1.13   |
| BBOA      | 0.39                                         | 0.05                                          | -0.34                          | 0.34                             | -1.63 | 1.63   |
| OOA       | 1.61                                         | 2.37                                          | 0.76                           | 1.01                             | 0.29  | 0.48   |

- 3 <sup>a</sup>Number of data points; Cabauw: 623; Finokalia: 494; Melpitz: 155; Mace Head: 329.

1 **Table S4.** Prediction skill metrics of PMCAMx-SR (base case) against AMS factor  
 2 analysis during 25 February – 23 March 2009<sup>a</sup>.

|            | Mean<br>Observed<br>( $\mu\text{g m}^{-3}$ ) | Mean<br>Predicted<br>( $\mu\text{g m}^{-3}$ ) | MB<br>( $\mu\text{g m}^{-3}$ ) | MAGE<br>( $\mu\text{g m}^{-3}$ ) | FBIAS | FERROR |
|------------|----------------------------------------------|-----------------------------------------------|--------------------------------|----------------------------------|-------|--------|
| Cabauw     |                                              |                                               |                                |                                  |       |        |
| OA         | 1.34                                         | 2.53                                          | 1.19                           | 1.50                             | 0.58  | 0.79   |
| HOA        | 0.25                                         | 0.55                                          | 0.30                           | 0.38                             | 0.71  | 0.90   |
| BBOA       | 0.13                                         | 1.05                                          | 0.93                           | 0.94                             | 1.35  | 1.40   |
| OOA        | 0.96                                         | 0.93                                          | -0.03                          | 0.53                             | 0.11  | 0.68   |
| Helsinki   |                                              |                                               |                                |                                  |       |        |
| OA         | 2.84                                         | 3.85                                          | 1.01                           | 1.28                             | 0.37  | 0.43   |
| HOA        | 0.45                                         | 0.29                                          | -0.16                          | 0.25                             | -0.14 | 0.66   |
| BBOA       | 0.40                                         | 1.67                                          | 1.27                           | 1.27                             | 1.19  | 1.19   |
| OOA        | 1.99                                         | 1.89                                          | -0.09                          | 0.58                             | -0.02 | 0.37   |
| Mace Head  |                                              |                                               |                                |                                  |       |        |
| OA         | 0.95                                         | 0.64                                          | -0.30                          | 1.33                             | 0.33  | 1.38   |
| HOA        | 0.09                                         | 0.004                                         | -0.09                          | 0.09                             | -0.53 | 1.15   |
| BBOA       | 0.34                                         | 0.01                                          | -0.32                          | 0.34                             | -0.42 | 1.24   |
| OOA        | 0.61                                         | 0.63                                          | 0.02                           | 0.99                             | 0.38  | 1.37   |
| Melpitz    |                                              |                                               |                                |                                  |       |        |
| OA         | 1.62                                         | 1.23                                          | -0.39                          | 0.94                             | -0.26 | 0.71   |
| HOA        | 0.15                                         | 0.09                                          | -0.05                          | 0.08                             | -0.31 | 0.68   |
| BBOA       | 0.18                                         | 0.37                                          | 0.19                           | 0.28                             | 0.69  | 0.93   |
| OOA        | 1.29                                         | 0.76                                          | -0.52                          | 0.85                             | -0.49 | 0.88   |
| Hyytiala   |                                              |                                               |                                |                                  |       |        |
| OA         | 1.45                                         | 2.36                                          | 0.92                           | 1.12                             | 0.55  | 0.66   |
| HOA        | 0.05                                         | 0.14                                          | 0.09                           | 0.09                             | 0.83  | 0.93   |
| BBOA       | 0.07                                         | 0.82                                          | 0.75                           | 0.75                             | 1.66  | 1.66   |
| OOA        | 1.33                                         | 1.41                                          | 0.08                           | 0.69                             | 0.12  | 0.58   |
| Barcelona  |                                              |                                               |                                |                                  |       |        |
| OA         | 8.66                                         | 3.62                                          | -5.04                          | 5.31                             | -0.68 | 0.78   |
| HOA        | 3.53                                         | 0.21                                          | -3.32                          | 3.32                             | -1.62 | 1.63   |
| BBOA       | 0.69                                         | 1.09                                          | 0.41                           | 0.72                             | 0.46  | 0.80   |
| OOA        | 4.45                                         | 2.32                                          | -2.13                          | 2.42                             | -0.51 | 0.69   |
| Chilbolton |                                              |                                               |                                |                                  |       |        |
| OA         | 2.49                                         | 1.12                                          | -1.39                          | 1.54                             | -0.61 | 0.81   |
| HOA        | 0.50                                         | 0.19                                          | -0.32                          | 0.33                             | -0.88 | 0.93   |
| BBOA       | 0.49                                         | 0.24                                          | -0.26                          | 0.36                             | -0.72 | 1.07   |
| OOA        | 1.49                                         | 0.69                                          | -0.79                          | 0.99                             | -0.55 | 0.87   |

3 <sup>a</sup>Number of data points; Cabauw: 418; Helsinki: 350; Mace Head: 206; Melpitz: 314;  
 4 Hyytiala: 426; Barcelona: 485; Chilbolton: 491.

1 **Table S5.** Prediction skill metrics of PMCAMx-SR (sensitivity test) against AMS  
 2 factor analysis during 25 February – 23 March 2009<sup>a</sup>.

|            | Mean<br>Observed<br>( $\mu\text{g m}^{-3}$ ) | Mean<br>Predicted<br>( $\mu\text{g m}^{-3}$ ) | MB<br>( $\mu\text{g m}^{-3}$ ) | MAGE<br>( $\mu\text{g m}^{-3}$ ) | FBIAS | FERROR |
|------------|----------------------------------------------|-----------------------------------------------|--------------------------------|----------------------------------|-------|--------|
| Cabauw     |                                              |                                               |                                |                                  |       |        |
| OA         | 1.34                                         | 2.65                                          | 1.31                           | 1.59                             | 0.60  | 0.81   |
| HOA        | 0.25                                         | 0.55                                          | 0.31                           | 0.38                             | 0.72  | 0.91   |
| BBOA       | 0.13                                         | 1.16                                          | 1.04                           | 1.05                             | 1.39  | 1.44   |
| OOA        | 0.96                                         | 0.93                                          | -0.03                          | 0.52                             | 0.11  | 0.68   |
| Helsinki   |                                              |                                               |                                |                                  |       |        |
| OA         | 2.84                                         | 3.98                                          | 1.14                           | 1.39                             | 0.39  | 0.45   |
| HOA        | 0.45                                         | 0.28                                          | -0.16                          | 0.25                             | -0.14 | 0.66   |
| BBOA       | 0.40                                         | 1.84                                          | 1.44                           | 1.44                             | 1.24  | 1.24   |
| OOA        | 1.99                                         | 1.86                                          | -0.14                          | 0.58                             | -0.04 | 0.36   |
| Mace Head  |                                              |                                               |                                |                                  |       |        |
| OA         | 1.04                                         | 0.63                                          | -0.41                          | 1.41                             | 0.31  | 1.38   |
| HOA        | 0.09                                         | 0.004                                         | -0.09                          | 0.09                             | -0.53 | 1.15   |
| BBOA       | 0.34                                         | 0.01                                          | -0.32                          | 0.34                             | -0.38 | 1.24   |
| OOA        | 0.61                                         | 0.62                                          | 0.004                          | 0.98                             | 0.38  | 1.37   |
| Melpitz    |                                              |                                               |                                |                                  |       |        |
| OA         | 1.62                                         | 1.25                                          | -0.36                          | 0.94                             | -0.25 | 0.70   |
| HOA        | 0.15                                         | 0.09                                          | -0.05                          | 0.08                             | -0.31 | 0.68   |
| BBOA       | 0.18                                         | 0.41                                          | 0.23                           | 0.31                             | 0.76  | 0.96   |
| OOA        | 1.29                                         | 0.75                                          | -0.54                          | 0.85                             | -0.51 | 0.88   |
| Hyytiala   |                                              |                                               |                                |                                  |       |        |
| OA         | 1.45                                         | 2.41                                          | 0.96                           | 1.14                             | 0.57  | 0.66   |
| HOA        | 0.05                                         | 0.14                                          | 0.08                           | 0.09                             | 0.82  | 0.93   |
| BBOA       | 0.07                                         | 0.89                                          | 0.83                           | 0.83                             | 1.68  | 1.68   |
| OOA        | 1.33                                         | 1.37                                          | 0.04                           | 0.67                             | 0.11  | 0.57   |
| Barcelona  |                                              |                                               |                                |                                  |       |        |
| OA         | 8.66                                         | 3.52                                          | -5.15                          | 5.39                             | -0.69 | 0.79   |
| HOA        | 3.53                                         | 0.21                                          | -3.32                          | 3.32                             | -1.62 | 1.63   |
| BBOA       | 0.69                                         | 1.19                                          | 0.51                           | 0.79                             | 0.52  | 0.83   |
| OOA        | 4.45                                         | 2.11                                          | -2.34                          | 2.56                             | -0.56 | 0.74   |
| Chilbolton |                                              |                                               |                                |                                  |       |        |
| OA         | 2.49                                         | 1.14                                          | -1.35                          | 1.53                             | -0.60 | 0.81   |
| HOA        | 0.50                                         | 0.19                                          | -0.32                          | 0.32                             | -0.87 | 0.93   |
| BBOA       | 0.49                                         | 0.26                                          | -0.24                          | 0.35                             | -0.66 | 1.03   |
| OOA        | 1.49                                         | 0.69                                          | -0.79                          | 0.99                             | -0.56 | 0.87   |

3 <sup>a</sup>Number of data points; Cabauw: 418; Helsinki: 350; Mace Head: 206; Melpitz: 314;  
 4 Hyytiala: 426; Barcelona: 485; Chilbolton: 491.

5

1 **Table S6.** Prediction skill metrics of PMCAMx and PMCAMx-SR against AMS  
 2 hourly measurements during May 2008<sup>a</sup>.  
 3

|                              | Mean<br>Observed<br>( $\mu\text{g m}^{-3}$ ) | Mean<br>Predicted<br>( $\mu\text{g m}^{-3}$ ) | MB<br>( $\mu\text{g m}^{-3}$ ) | MAGE<br>( $\mu\text{g m}^{-3}$ ) | FBIAS | FERROR |
|------------------------------|----------------------------------------------|-----------------------------------------------|--------------------------------|----------------------------------|-------|--------|
| PMCAMx                       |                                              |                                               |                                |                                  |       |        |
| OA                           | 3.43                                         | 4.01                                          | 0.57                           | 1.26                             | 0.17  | 0.37   |
| OOA                          | 2.84                                         | 3.71                                          | 0.87                           | 1.29                             | 0.29  | 0.42   |
| PMCAMx-SR (Base Case)        |                                              |                                               |                                |                                  |       |        |
| OA                           | 3.44                                         | 4.06                                          | 0.62                           | 1.29                             | 0.18  | 0.38   |
| OOA                          | 2.84                                         | 3.70                                          | 0.85                           | 1.28                             | 0.29  | 0.42   |
| PMCAMx-SR (Sensitivity test) |                                              |                                               |                                |                                  |       |        |
| OA                           | 3.44                                         | 3.79                                          | 0.35                           | 1.16                             | 0.12  | 0.36   |
| OOA                          | 2.84                                         | 3.41                                          | 0.57                           | 1.10                             | 0.22  | 0.39   |

4  
 5 <sup>a</sup> Sites: Cabauw, Finokalia, Melpitz and Mace Head. Number of data points: 1601.  
 6  
 7  
 8  
 9  
 10  
 11  
 12  
 13  
 14  
 15  
 16  
 17  
 18  
 19  
 20  
 21  
 22

1 **Table S7.** Prediction skill metrics of PMCAMx and PMCAMx-SR against AMS  
 2 hourly measurements during 25 February – 23 March 2009<sup>a</sup>.

|                              | Mean<br>Observed<br>( $\mu\text{g m}^{-3}$ ) | Mean<br>Predicted<br>( $\mu\text{g m}^{-3}$ ) | MB<br>( $\mu\text{g m}^{-3}$ ) | MAGE<br>( $\mu\text{g m}^{-3}$ ) | FBIAS  | FERROR |
|------------------------------|----------------------------------------------|-----------------------------------------------|--------------------------------|----------------------------------|--------|--------|
| PMCAMx                       |                                              |                                               |                                |                                  |        |        |
| OA                           | 3.09                                         | 2.2                                           | -0.89                          | 2                                | -0.05  | 0.75   |
| OOA                          | 1.89                                         | 1.33                                          | -0.56                          | 1.05                             | -0.17  | 0.73   |
| PMCAMx-SR (Base Case)        |                                              |                                               |                                |                                  |        |        |
| OA                           | 3.08                                         | 2.32                                          | -0.76                          | 2.03                             | -0.01  | 0.77   |
| OOA                          | 1.89                                         | 1.30                                          | -0.59                          | 1.06                             | -0.19  | 0.74   |
| PMCAMx-SR (Sensitivity test) |                                              |                                               |                                |                                  |        |        |
| OA                           | 3.08                                         | 2.35                                          | -0.74                          | 2.08                             | -0.006 | 0.76   |
| OOA                          | 1.89                                         | 1.24                                          | -0.65                          | 1.08                             | -0.20  | 0.74   |

3  
 4 <sup>a</sup> Sites: Cabauw, Helsinki, Mace Head, Melpitz, Hyytiala, Barcelona, and Chilbolton.  
 5 Number of data points for all species: 2690.

6  
 7



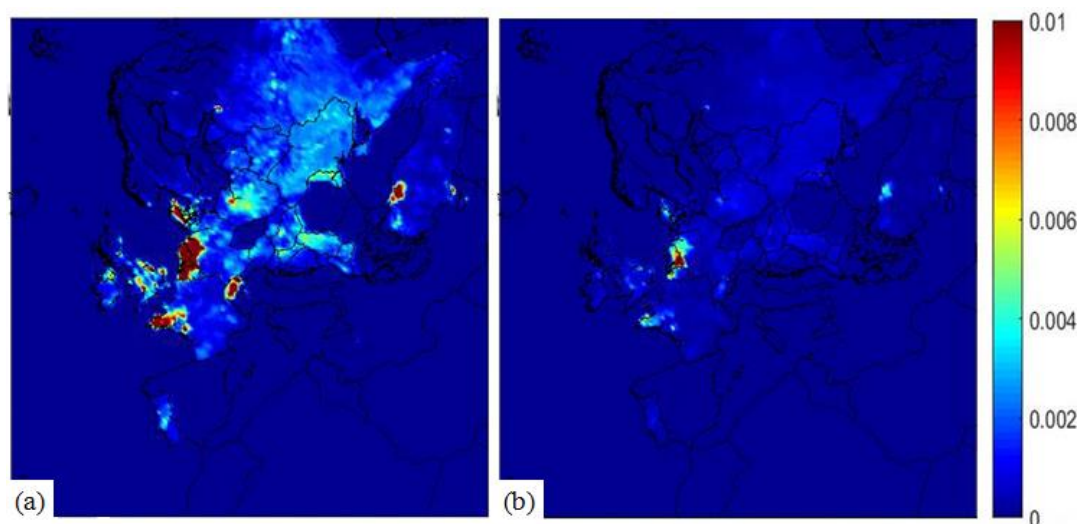

1

2 **Figure S1.** OA ground level emission rates ( $\text{kg d}^{-1} \text{ km}^{-2}$ ) spatial distribution from  
3 agricultural activities (waste burning) for (a) 1-29 May 2008 and (b) 25 February-22  
4 March 2009. During both periods the average value of this source is approximately  $7$   
5  $\times 10^{-3} \text{ kg d}^{-1} \text{ km}^{-2}$  and the maximum value is nearly  $4 \text{ kg d}^{-1} \text{ km}^{-2}$  in the Netherlands.

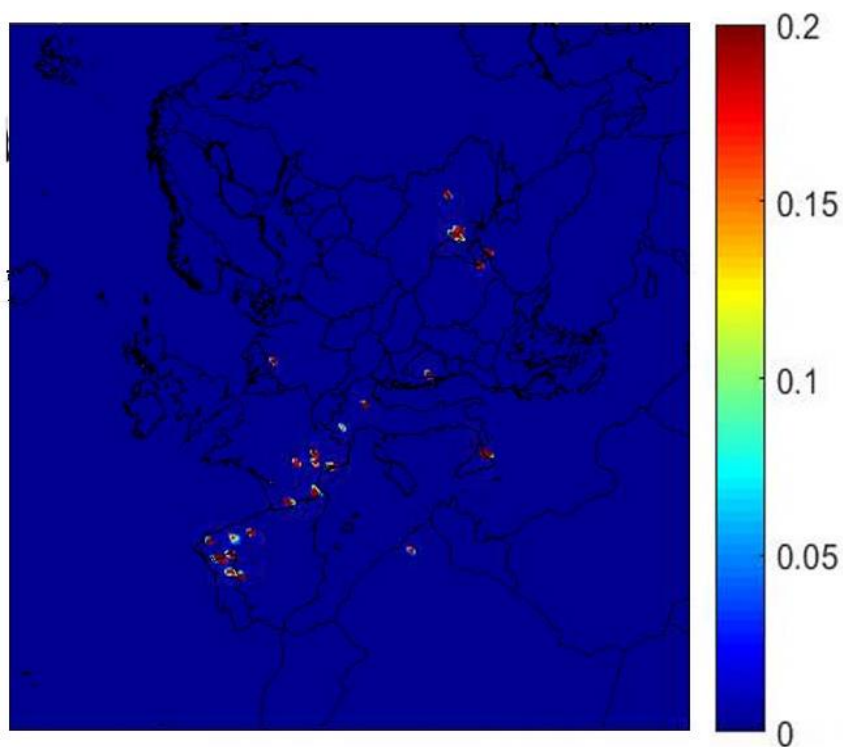

1

2 **Figure S2.** OA ground level emission rates ( $\text{kg d}^{-1} \text{ km}^{-2}$ ) spatial distribution from  
3 wildfires during 25 February-22 March 2009. Nearly 2000  $\text{tn day}^{-1}$  are emitted in  
4 northwestern Spain and northern Portugal. The 2009 national fire data from these two  
5 countries based on the European Forest Fire Information System (EFFIS)  
6 (<http://effis.jrc.ec.europa.eu>) indicated intense fire activity in the second half of March  
7 driven by dry weather and strong winds.

8

1

2

### Majden (FYROM)

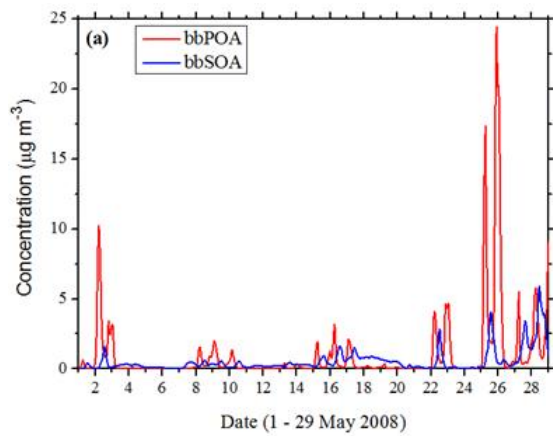

### Catania (Italy)

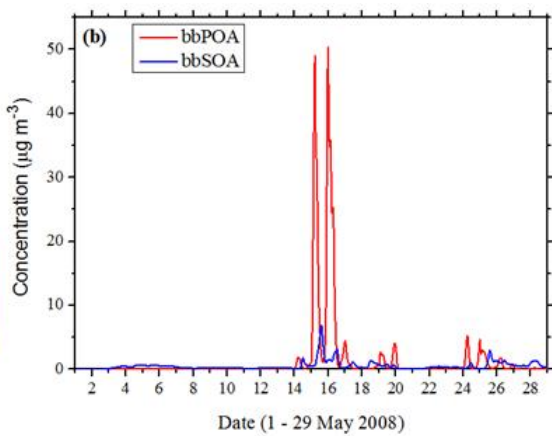

3

4

### Paris (France)

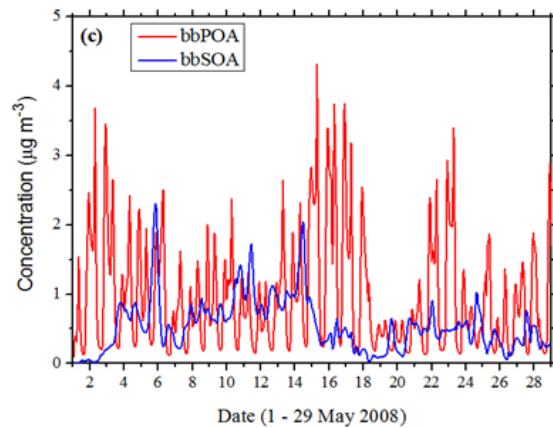

### Dusseldorf (Germany)

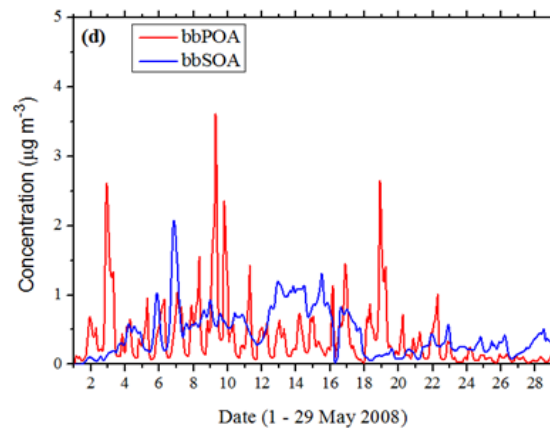

5

6

7 **Figure S3.** Timeseries of PM<sub>2.5</sub> bbOA concentrations in (a) Majden (FYROM), (b)  
8 Catania (Italy), (c) Paris (France) and (d) Dusseldorf (Germany) during 1-29 May  
9 2008.

1

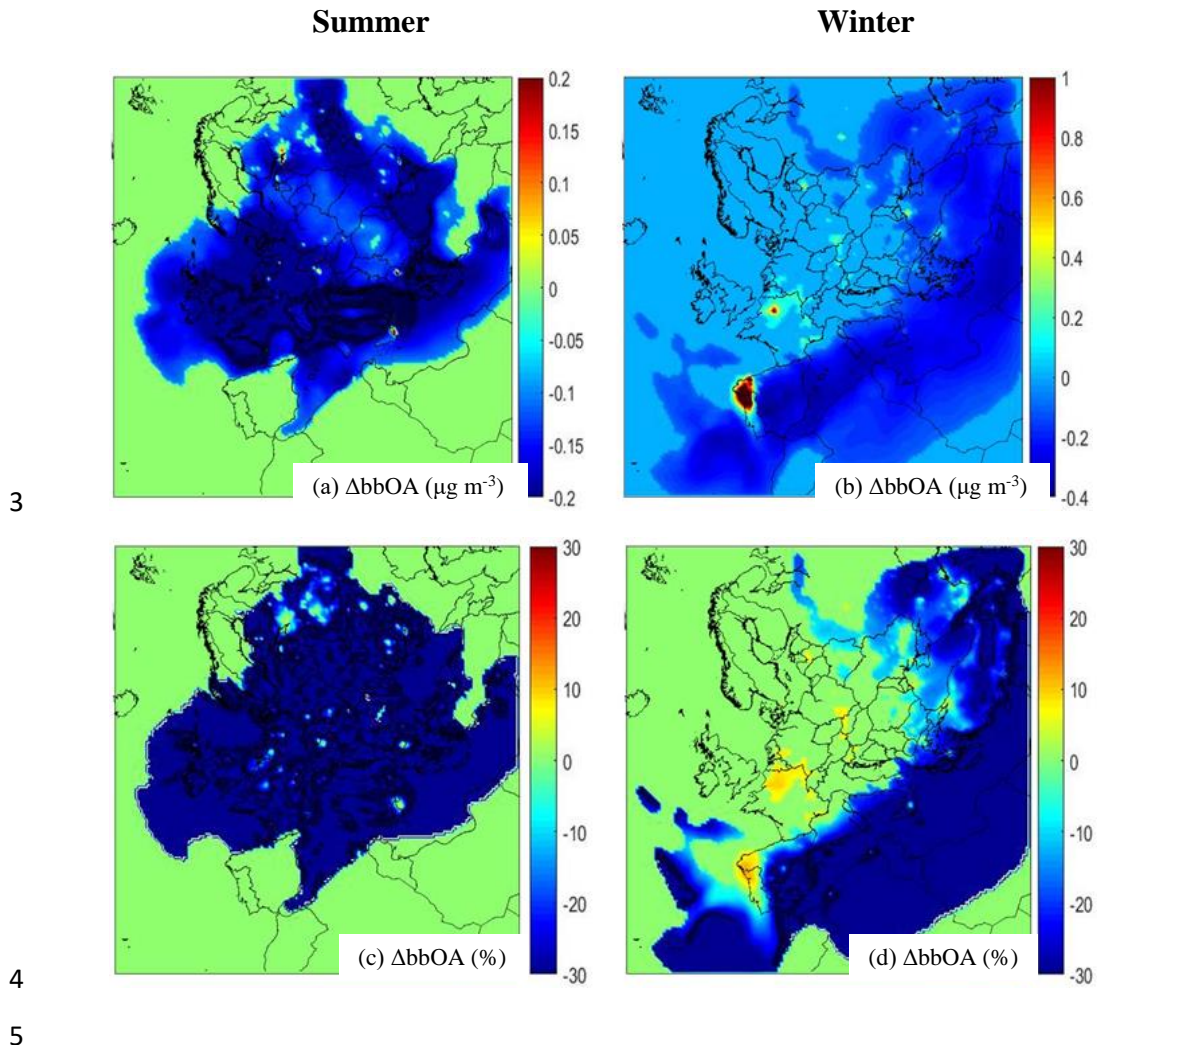

6 **Figure S4.** Average predicted absolute ( $\mu\text{g m}^{-3}$ ) change of ground-level  $\text{PM}_{2.5}$  total  
7 bbOA concentrations from PMCAMx-SR base case and sensitivity simulations during  
8 the modeled summer and winter periods (a-b). Also shown the corresponding relative  
9 (%) change of ground-level  $\text{PM}_{2.5}$  total bbOA concentrations during the modeled  
10 periods (c-d). Positive values indicate that PMCAMx-SR sensitivity run predicts  
11 higher concentrations.
